# Supplementary material for: Arachidin-1, a Prenylated Stilbenoid from Peanut, Enhances the Anticancer Effects of Paclitaxel in Triple-Negative Breast Cancer Cells
Source: MDPI journal article supplement (doi:10.3390/cancers15020399), 2023-01-07
Supplement: s1 [file s1]

## Supplementary Information

**Table S1.** Cytotoxicity of arachidin-3 and paclitaxel alone or in combination in TNBC cells.

| 24 h       | Arachidin-3 (μM) | Paclitaxel IC50 (nM) | Fold decrease compared to paclitaxel Alone | Paclitaxel (nM) | Arachidin-3 IC50 (μM) | Fold decrease compared to Arachidin-3 Alone |
|------------|------------------|----------------------|--------------------------------------------|-----------------|-----------------------|---------------------------------------------|
| MDA-MB-231 | 0                | 2.24 ± 0.03          |                                            | 0               | 12.78 ± 1.65          |                                             |
|            | 0.1              | 1.14 ± 0.12 **       | 2.04                                       | 0.1             | 9.24 ± 1.73           | 1.36                                        |
|            | 1                | 0.78 ± 0.06 ****     | 2.99                                       | 1               | 7.11 ± 0.11 *         | 1.77                                        |
|            | 10               | 0.60 ± 0.19 **       | 3.98                                       | 10              | 6.72 ± 0.18 *         | 1.88                                        |
| MDA-MB-436 | 0                | 2.87 ± 0.17          |                                            | 0               | 12.78 ± 1.65          |                                             |
|            | 0.1              | 2.40 ± 0.19          | 1.03                                       | 0.1             | 9.24 ± 1.73           | 1.19                                        |
|            | 1                | 1.29 ± 0.07 **       | 1.92                                       | 1               | 7.11 ± 0.11 *         | 1.55                                        |
|            | 10               | 0.55 ± 0.19 **       | 4.54                                       | 10              | 6.72 ± 0.18 *         | 1.65                                        |
| 48 h       | Arachidin-3 (μM) | Paclitaxel IC50 (nM) | Fold decrease compared to paclitaxel Alone | Paclitaxel (nM) | Arachidin-3 IC50 (μM) | Fold decrease compared to Arachidin-3 Alone |
| MDA-MB-231 | 0                | 2.52 ± 0.07          |                                            | 0               | 14.70 ± 1.79          |                                             |
|            | 0.1              | 1.24 ± 0.10 **       | 1.89                                       | 0.1             | 9.86 ± 1.92           | 1.28                                        |
|            | 1                | 0.73 ± 0.14 ***      | 3.19                                       | 1               | 7.67 ± 1.82           | 1.64                                        |
|            | 10               | 0.79 ± 0.05 ****     | 2.95                                       | 10              | 7.03 ± 1.21 *         | 1.79                                        |
| MDA-MB-436 | 0                | 2.39 ± 0.27          |                                            | 0               | 12.98 ± 1.19          |                                             |
|            | 0.1              | 2.14 ± 0.11          | 1.16                                       | 0.1             | 12.45 ± 1.65          | 0.88                                        |
|            | 1                | 1.45 ± 0.18          | 1.71                                       | 1               | 6.72 ± 1.03 *         | 1.64                                        |
|            | 10               | 0.64 ± 0.13          | 3.85                                       | 10              | 6.36 ± 1.02 *         | 1.73                                        |
| 72 h       | Arachidin-3 (μM) | Paclitaxel IC50 (nM) | Fold decrease compared to paclitaxel Alone | Paclitaxel (nM) | Arachidin-3 IC50 (μM) | Fold decrease compared to Arachidin-3 Alone |
| MDA-MB-231 | 0                | 2.33 ± 0.18          |                                            | 0               | 12.60 ± 2.10          |                                             |
|            | 0.1              | 0.87 ± 0.19 *        | 2.68                                       | 0.1             | 10.33 ± 1.90          | 1.22                                        |
|            | 1                | 0.70 ± 0.23 *        | 3.33                                       | 1               | 10.04 ± 1.29          | 1.25                                        |
|            | 10               | 0.62 ± 0.07 **       | 3.75                                       | 10              | 3.97 ± 1.53           | 3.17                                        |
| MDA-MB-436 | 0                | 2.48 ± 0.12          |                                            | 0               | 11.00 ± 0.25          |                                             |
|            | 0.1              | 1.53 ± 0.16 *        | 1.63                                       | 0.1             | 8.46 ± 0.68 *         | 1.30                                        |
|            | 1                | 1.06 ± 0.05 ***      | 2.34                                       | 1               | 10.63 ± 1.50          | 1.03                                        |
|            | 10               | 1.22 ± 0.41          | 2.03                                       | 10              | 5.92 ± 1.13 *         | 1.86                                        |

IC<sub>50</sub> values of paclitaxel, arachidin-3 , and the IC<sub>50</sub> fold decrease compared to each compound alone for all combination ± the standard error of mean (\**p*<0.05; \*\**p*<0.01; \**p*-values compare IC<sub>50</sub> values of combination treatment to individual compound alone).

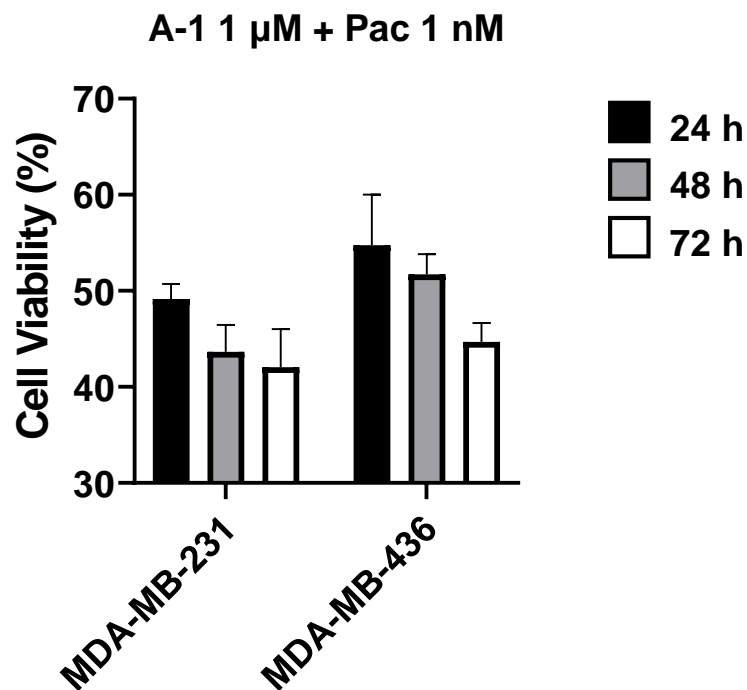

**Figure S1.** Cytotoxicity of arachidin-1 (A-1, 1  $\mu$ M) combined with paclitaxel (Pac, 1 nM) in MDA-MB-231 and MDA-MB-436 cell lines. Cell viability was evaluated at 24, 48, and 72 h. Data represent mean  $\pm$  SEM. N = 3. \* $p$  < 0.05 *versus* control.

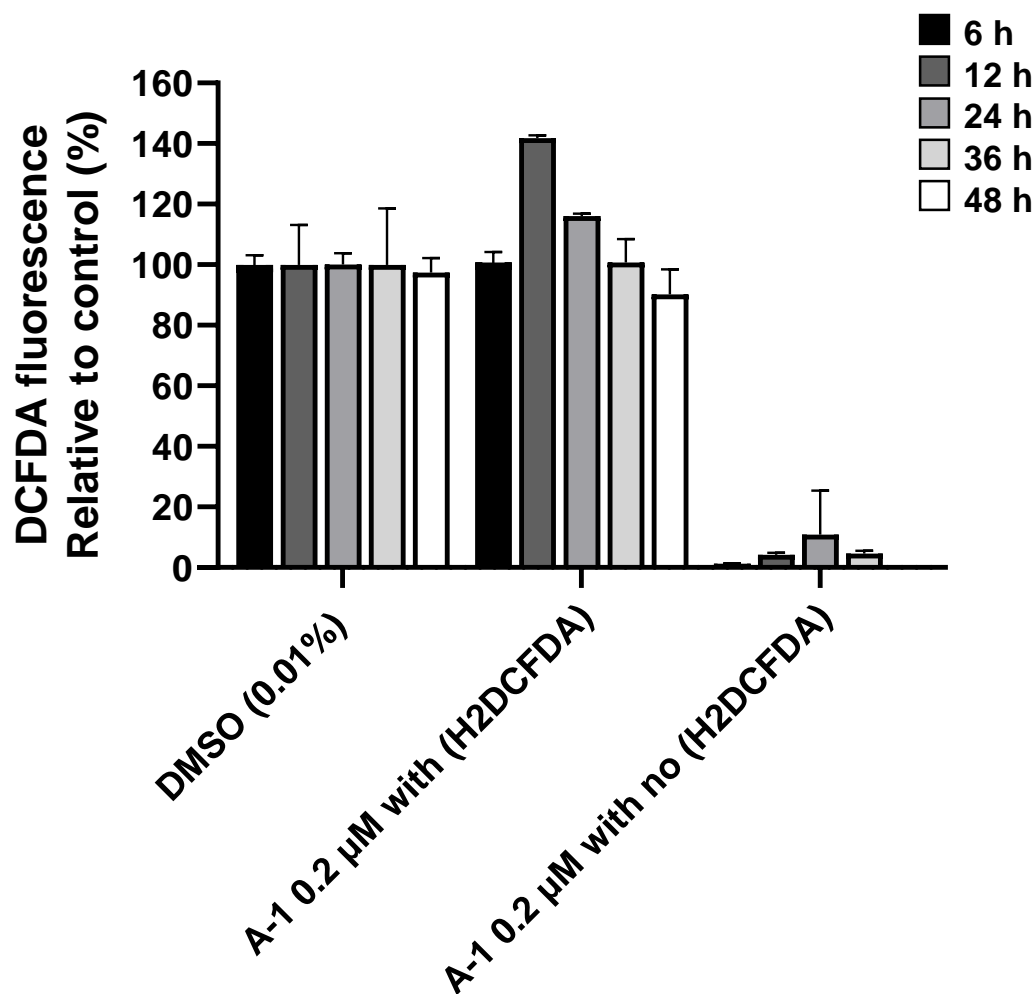

**Figure S2.** Levels of DCFDA fluorescence normalized to control (DMSO, 0.01%) in TNBC cell line MDA-MB-231 in the absence or presence of H2DCFDA. Fluorescence was measured at excitation: 492–495 nm and emission: 517–527 nm. The data is expressed as mean  $\pm$  SEM of three replicates.

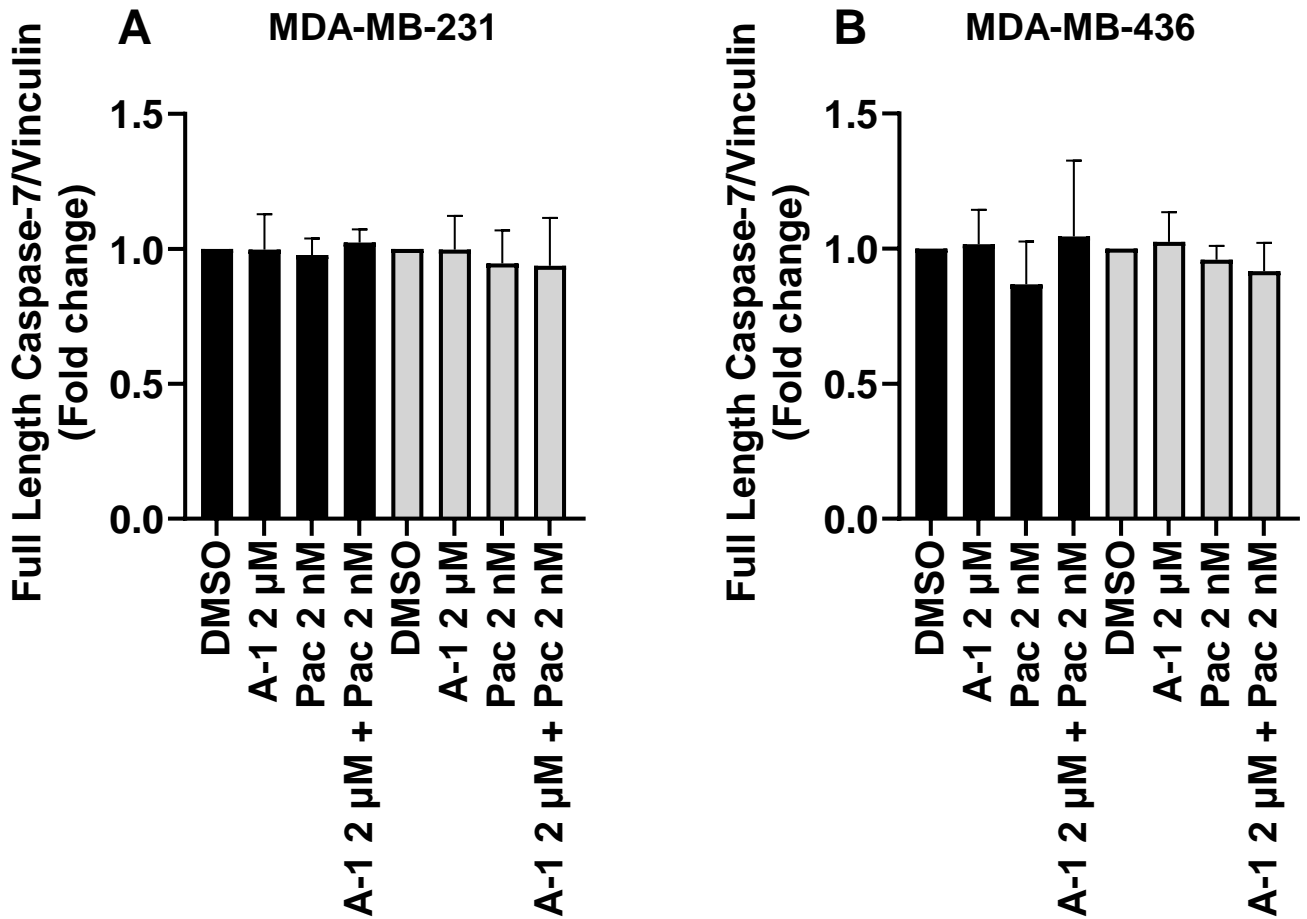

**Figure S3.** Densitometric protein expression comparison of caspase-7 in TNBC cell lines MDA-MB-231 (A) and MDA-MB-436 (B). Cells were treated with A-1 (0.2 and 2  $\mu$ M) and/or paclitaxel (0.2 and 2 nM) for 24 h (black bars) and 48 h (grey bars). Cells were treated with 0.01% DMSO were used as a control. Densitometric comparisons represent the fold-change of the target protein compared to the loading control vinculin. The data represents mean  $\pm$  SEM, N = 3.

## **Western Blot Data**

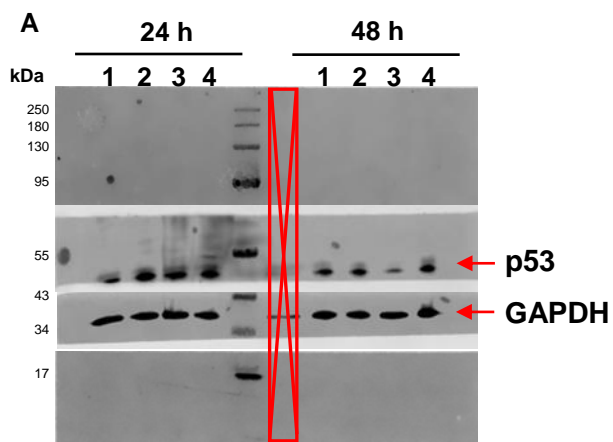

| 24 h      | 1    | 2    | 3    | 4    |
|-----------|------|------|------|------|
| p53/GAPDH | 0.44 | 1.09 | 1.25 | 1.81 |
| 48 h      | 1    | 2    | 3    | 4    |
| p53/GAPDH | 1.14 | 1.17 | 0.47 | 1.17 |

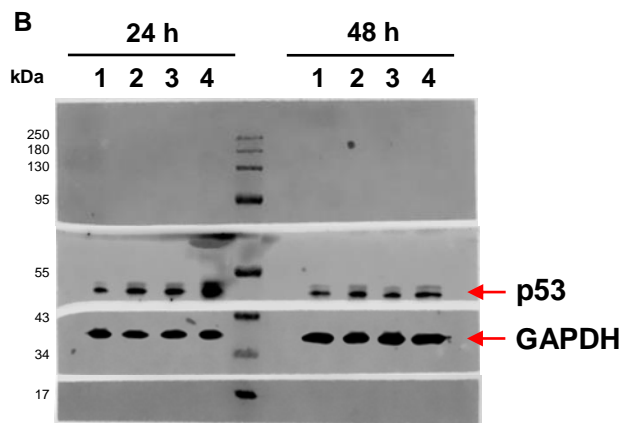

| 24 h      | 1    | 2    | 3    | 4    |
|-----------|------|------|------|------|
| p53/GAPDH | 0.23 | 0.54 | 0.55 | 1.42 |
| 48 h      | 1    | 2    | 3    | 4    |
| p53/GAPDH | 0.81 | 1.15 | 0.88 | 1.14 |

Original unedited blot used in Figure 7 (A) MDA-MB-231 and (B) MDA-MB-436. 1, DMSO; 2, A-1 2  $\mu$ M; 3, Pac 2 nM; 4, A-1 2  $\mu$ M + Pac 2 nM.

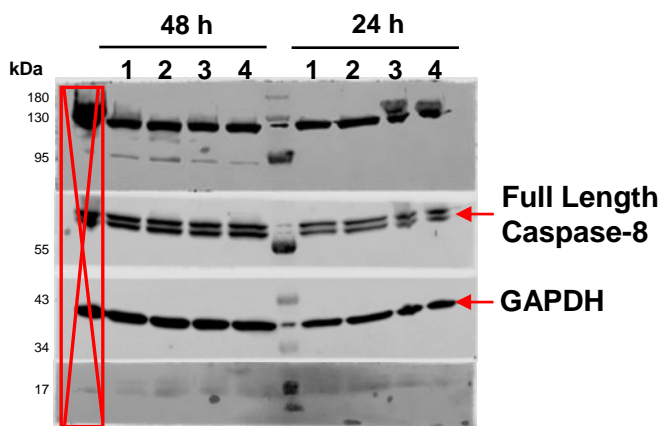

| 24 h                         | 1    | 2    | 3    | 4    |
|------------------------------|------|------|------|------|
| Full Length Caspase-8 /GAPDH | 1.64 | 1.56 | 1.62 | 1.43 |
| 48 h                         | 1    | 2    | 3    | 4    |
| Full Length Caspase-8 /GAPDH | 1.09 | 1.35 | 1.29 | 1.38 |

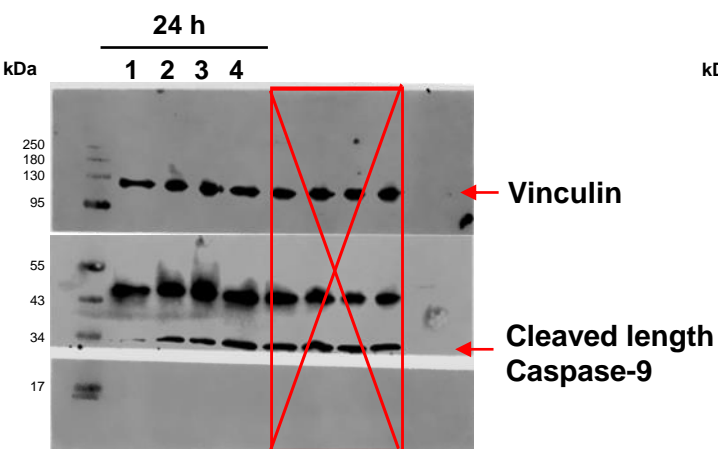

| 24 h                              | 1    | 2    | 3    | 4    |
|-----------------------------------|------|------|------|------|
| Cleaved Length Caspase-9/Vinculin | 0.28 | 0.78 | 0.69 | 1.21 |

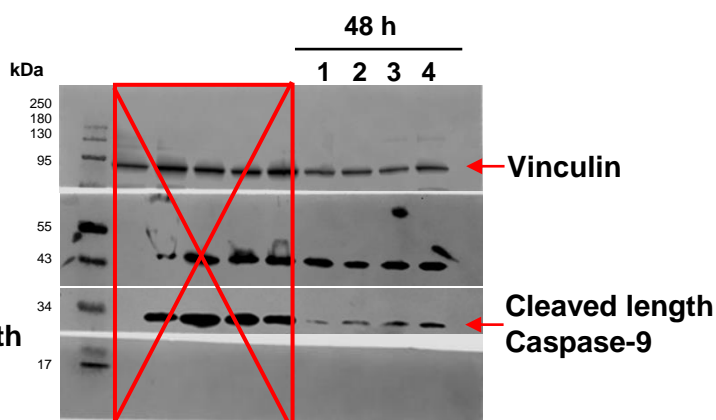

| 48 h                              | 1    | 2    | 3    | 4    |
|-----------------------------------|------|------|------|------|
| Cleaved Length Caspase-9/Vinculin | 0.25 | 0.65 | 1.06 | 0.81 |

Original unedited blot used in Figure 9. 1, DMSO; 2, A-1 2  $\mu$ M; 3, Pac 2 nM; 4, A-1 2  $\mu$ M + Pac 2 nM.



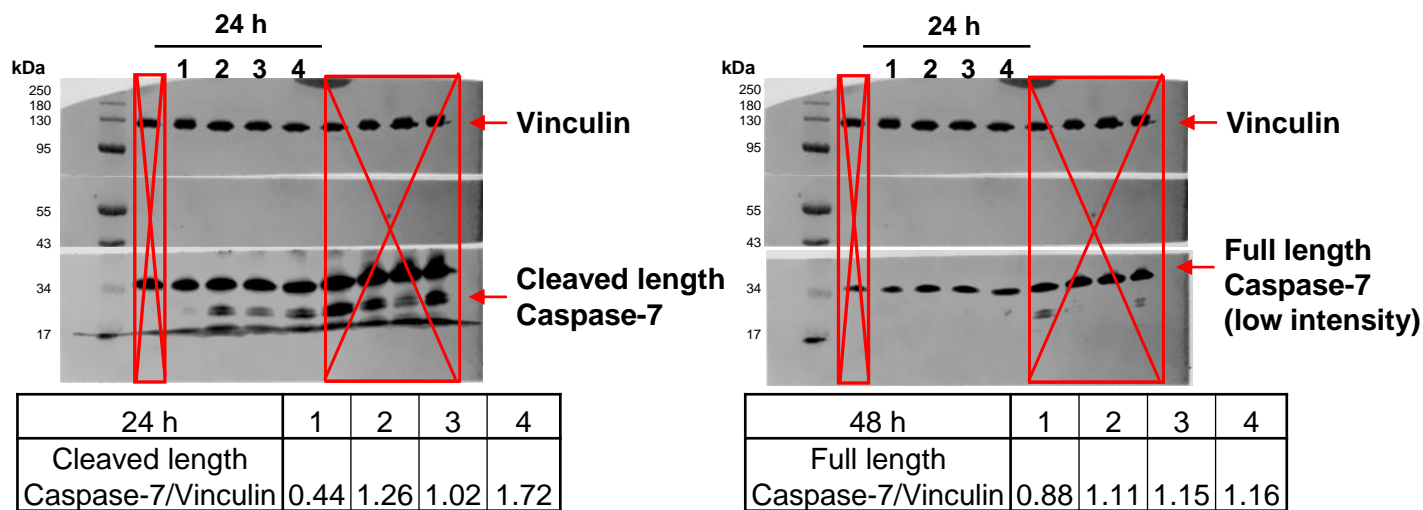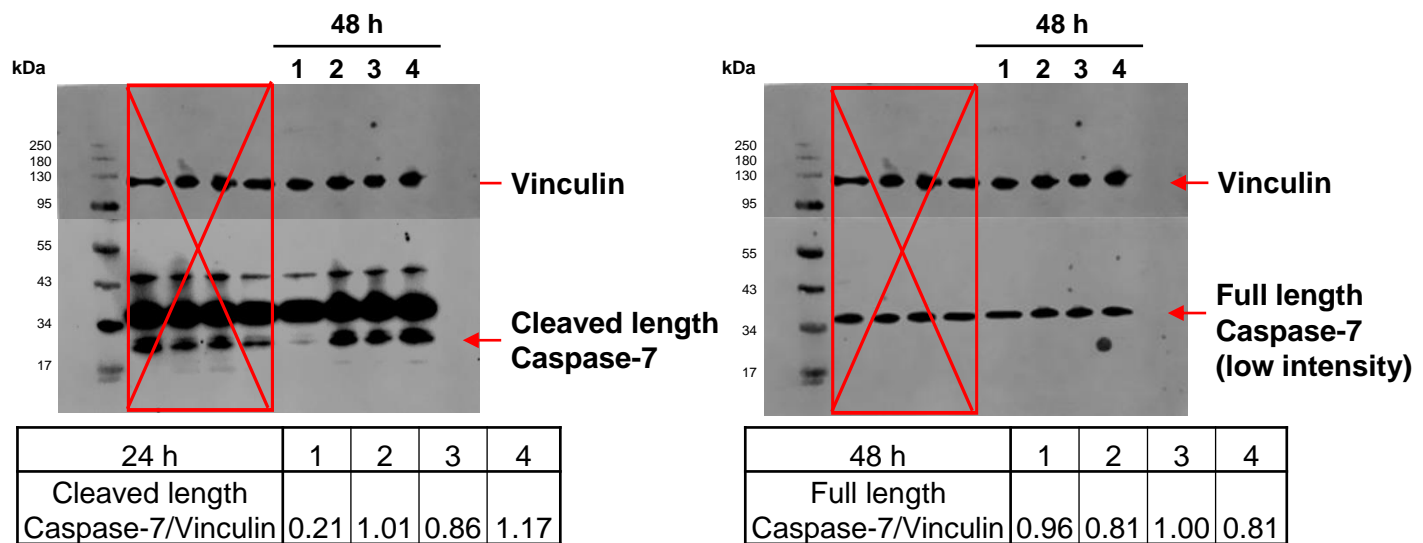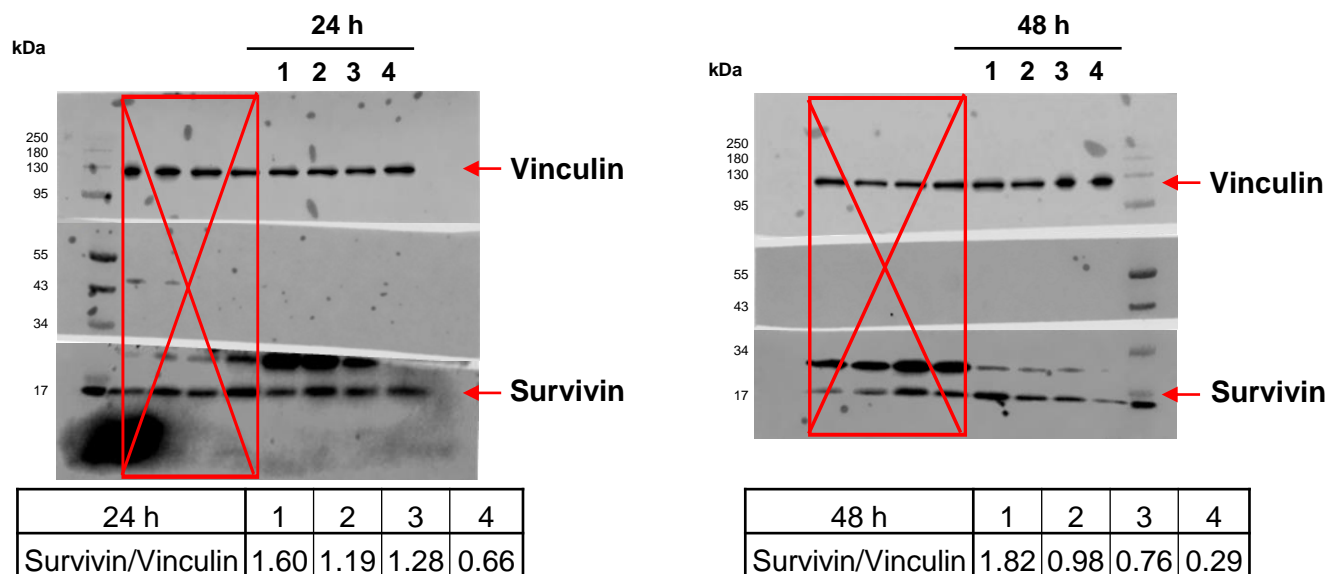

Original unedited blot used in Figure 9. 1, DMSO; 2, A-1 2  $\mu$ M; 3, Pac 2 nM; 4, A-1 2  $\mu$ M + Pac 2 nM.

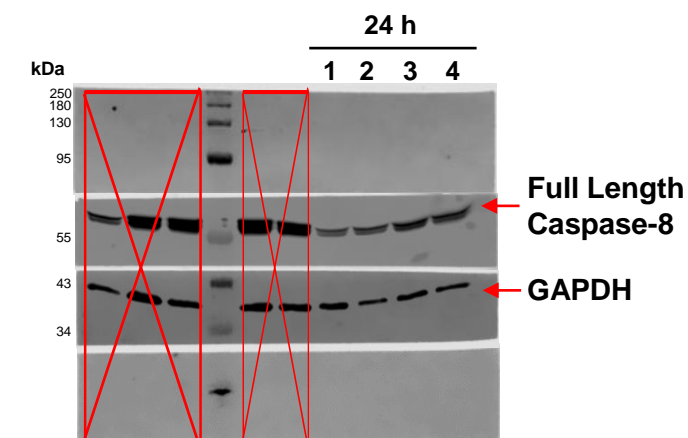

| 24 h                        | 1    | 2    | 3    | 4    |
|-----------------------------|------|------|------|------|
| Full Length Caspase-8/GAPDH | 0.61 | 0.64 | 0.75 | 0.75 |

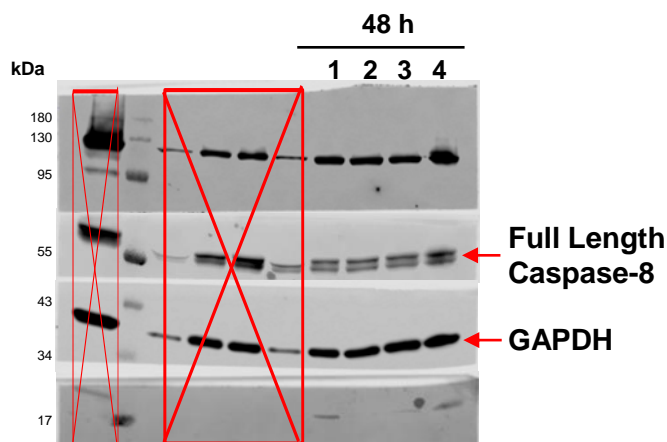

| 48 h                        | 1    | 2    | 3    | 4    |
|-----------------------------|------|------|------|------|
| Full Length Caspase-8/GAPDH | 1.32 | 1.24 | 1.16 | 1.24 |

17

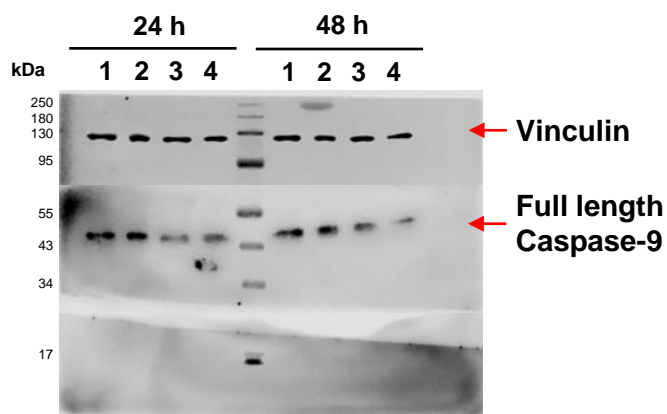

| 24 h                            | 1    | 2    | 3    | 4    |
|---------------------------------|------|------|------|------|
| Full Length Caspase-9 /Vinculin | 2.75 | 2.11 | 0.88 | 1.20 |
| 48 h                            | 1    | 2    | 3    | 4    |
| Full Length Caspase-9 /Vinculin | 1.83 | 1.77 | 1.34 | 0.77 |

Original unedited blot used in Figure 10. 1, DMSO; 2, A-1 2  $\mu$ M; 3, Pac 2 nM; 4, A-1 2  $\mu$ M + Pac 2 nM.

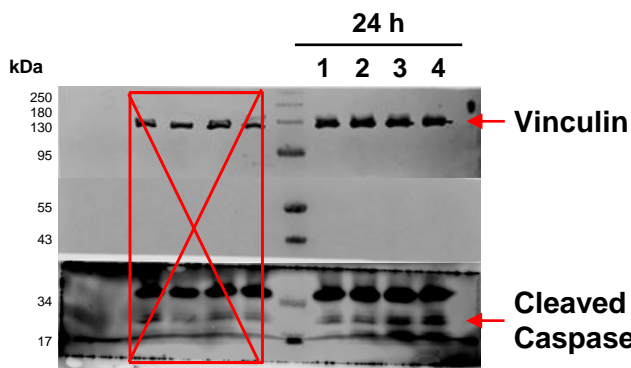

| 24 h                              | 1    | 2    | 3    | 4    |
|-----------------------------------|------|------|------|------|
| Cleaved length Caspase-7/Vinculin | 0.43 | 0.58 | 1.45 | 1.59 |

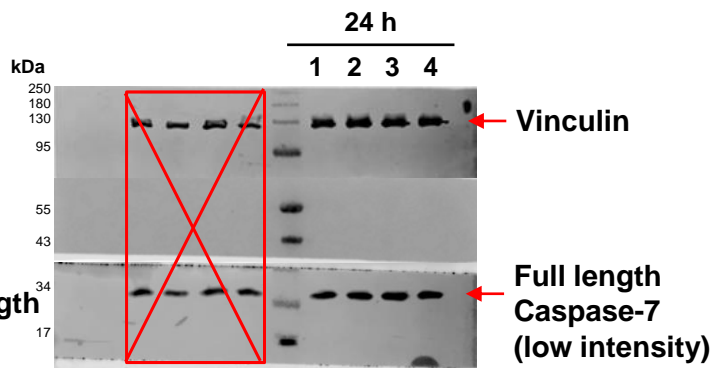

| 48 h                           | 1    | 2    | 3    | 4    |
|--------------------------------|------|------|------|------|
| Full length Caspase-7/Vinculin | 0.99 | 0.94 | 1.11 | 0.98 |

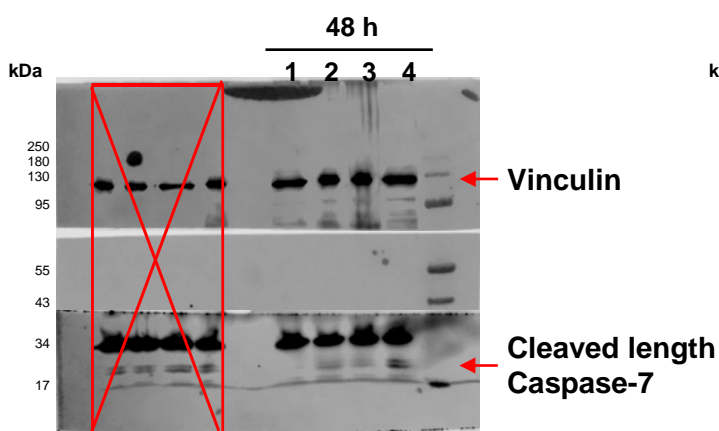

| 24 h                              | 1    | 2    | 3    | 4    |
|-----------------------------------|------|------|------|------|
| Cleaved length Caspase-7/Vinculin | 0.61 | 0.66 | 0.54 | 1.00 |

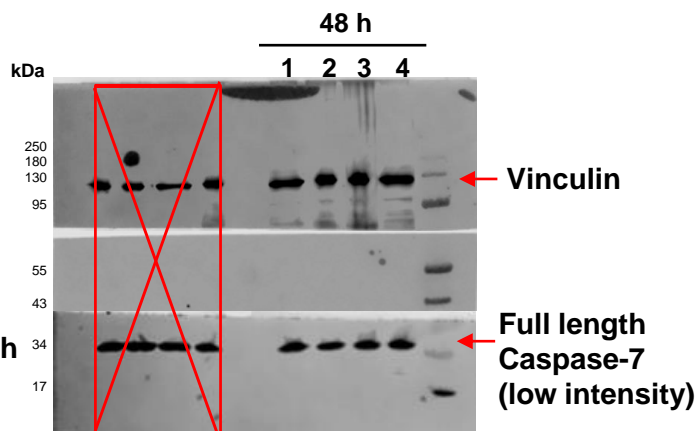

| 48 h                           | 1    | 2    | 3    | 4    |
|--------------------------------|------|------|------|------|
| Full length Caspase-7/Vinculin | 1.18 | 1.10 | 1.13 | 1.03 |

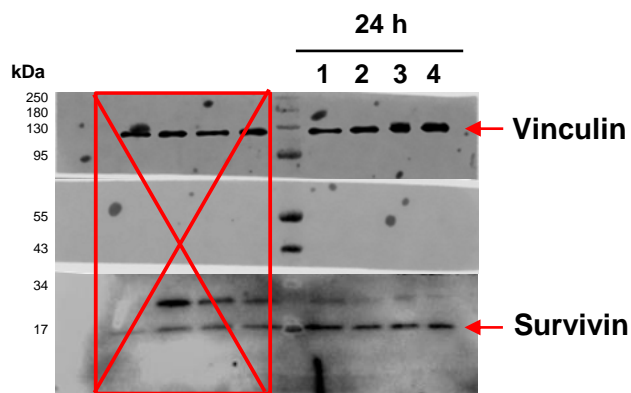

| 48 h              | 1    | 2    | 3    | 4    |
|-------------------|------|------|------|------|
| Survivin/Vinculin | 2.72 | 1.20 | 1.28 | 0.36 |

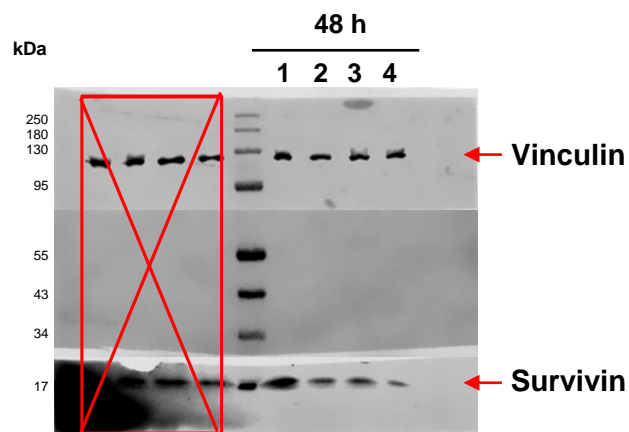

| 24 h              | 1    | 2    | 3    | 4    |
|-------------------|------|------|------|------|
| Survivin/Vinculin | 1.05 | 0.33 | 0.24 | 0.27 |

Original unedited blot used in Figure 10. 1, DMSO; 2, A-1 2  $\mu$ M; 3, Pac 2 nM; 4, A-1 2  $\mu$ M + Pac 2 nM.
